# Supplementary material for: Assessment and Transition Planning: A Curriculum for School Psychologists and Special Educators.
Source: Royal Society of Chemistry journal article supplement (doi:10.1039/d4cp00147h), 1994-06-01
Supplement: d4cp00147h1.pdf [file d4cp00147h1.pdf]

## Supplementary Information

### Thermal transport in a defective pillared graphene network : Insights from equilibrium molecular dynamics simulation

Vivekkumar Panneerselvam and Sarith P Sathian\*  
Department of Applied Mechanics and Biomedical Engineering,  
Indian Institute of Technology, Chennai, India.  
\*sarith@iitm.ac.in

#### S1. Comparison of simulation results

To validate our simulation procedure, we conducted equilibrium molecular dynamics (EMD) simulations using the Green-Kubo formalism for a graphene nanoribbon measuring  $10\text{ nm} \times 1\text{ nm} \times 0.34\text{ nm}$  in dimension, as illustrated in Fig.S1. The chosen system dimensions were adopted from Ref.[S1] and [S2] to facilitate a comparison of the computed thermal conductivity. Initially, the system was thermally equilibrated at 300 K through a Nose-Hoover thermostat in the NVT ensemble, employing  $3 \times 10^5$  time steps. Subsequently, the NVE ensemble was employed for  $1 \times 10^7$  time steps to calculate the heat flux correlation function. The carbon-carbon interaction was modeled using an optimized Tersoff potential with a time step of 0.5 fs. Consistency was maintained in the simulation procedure, potential, and system dimensions, following Ref.[S1] and [S2]. The resulting thermal conductivities were compared and illustrated in Fig.S2. Notably, our computed thermal conductivity aligns well with the values reported in Ref.[S1] and [S2].

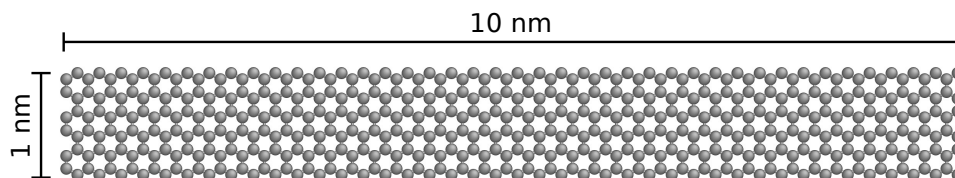

Figure S1: Graphene nanoribbon.

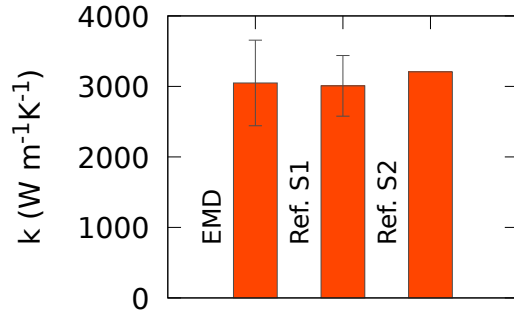

Figure S2: Thermal conductivity of graphene nanoribbon.

## S2. Effect of system size on thermal conductivity

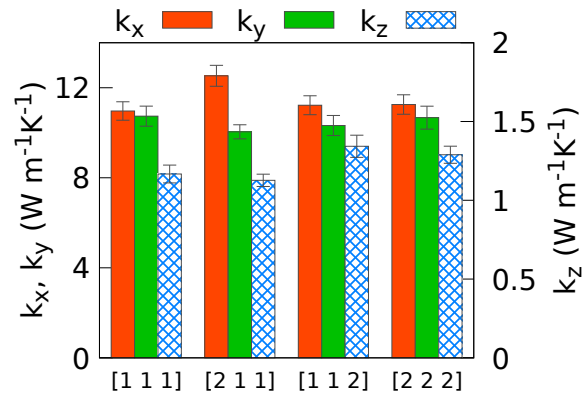

Figure S3: Thermal conductivity of a PG system with varying system dimensions. The values within the brackets [ ] indicate the number of unit cells considered for the analysis along the  $x$ ,  $y$  and  $z$  directions, respectively.

**S3. Comparison of PPR to study the effect of defect location in  $PG_z$  configuration**

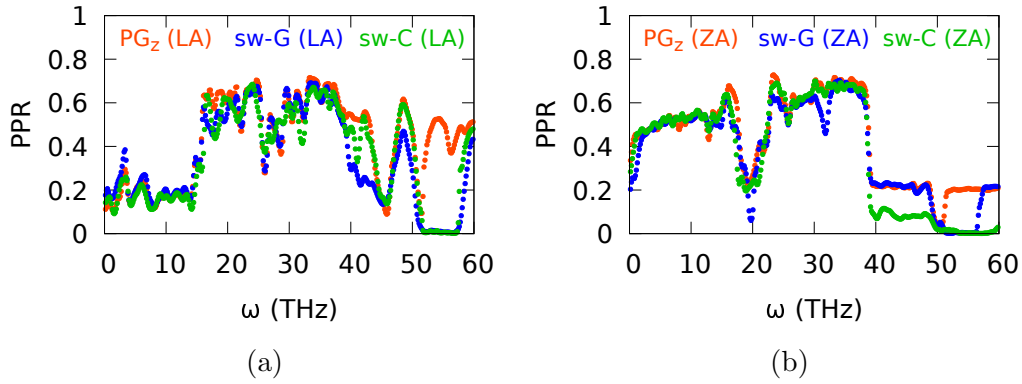

Figure S4: (a)-(b) Comparative analysis of phonon participation ratio in defect-free and defective  $PG_z$  configuration at LA and ZA phonon modes.

**S4. Comparison of PPR to study the effect of defect type in  $PG_z$  configuration**

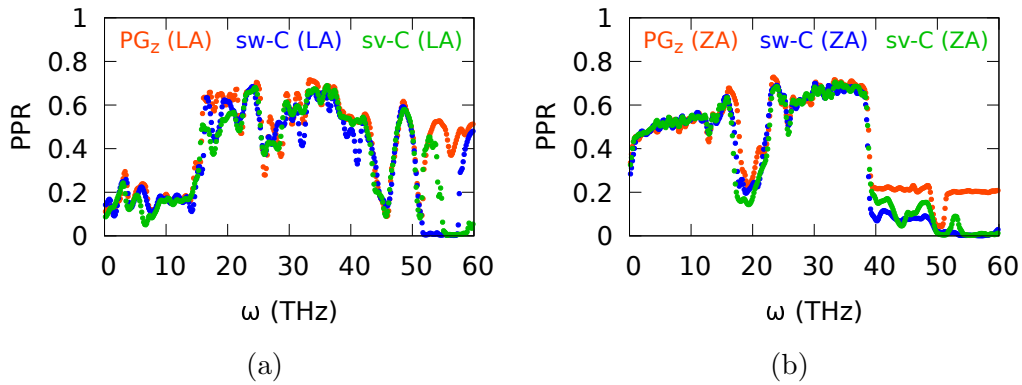

Figure S5: (a)-(b) Comparative analysis of phonon participation ratio in defect-free, sw-C, and sv-C  $PG_z$  configurations for LA and ZA phonon modes.

## References

- [S1] W. J. Evans, L. Hu, and P. Keblinski, “Thermal conductivity of graphene ribbons from equilibrium molecular dynamics: Effect of ribbon width, edge roughness, and hydrogen termination,” *Applied Physics Letters*, vol. 96, no. 20, 2010.
- [S2] A. I. Khan, I. A. Navid, M. Noshin, H. A. Uddin, F. F. Hossain, and S. Subrina, “Equilibrium molecular dynamics (md) simulation study of thermal conductivity of graphene nanoribbon: a comparative study on md potentials,” *Electronics*, vol. 4, no. 4, pp. 1109–1124, 2015.
